# Supplementary material for: Cytoplasmic Localization of Thyroid Hormone Receptor (TR) Alpha and Nuclear Expression of Its Isoform TRα2 Determine Survival in Breast Cancer in Opposite Ways
Source: MDPI journal article supplement (doi:10.3390/cancers15143610), 2023-07-13
Supplement: s1 [file s1]

**Suppl. Figure S1: Control stainings for all antibodies used in this study**

Positive control staining for TR $\alpha$  in thyroid tissue

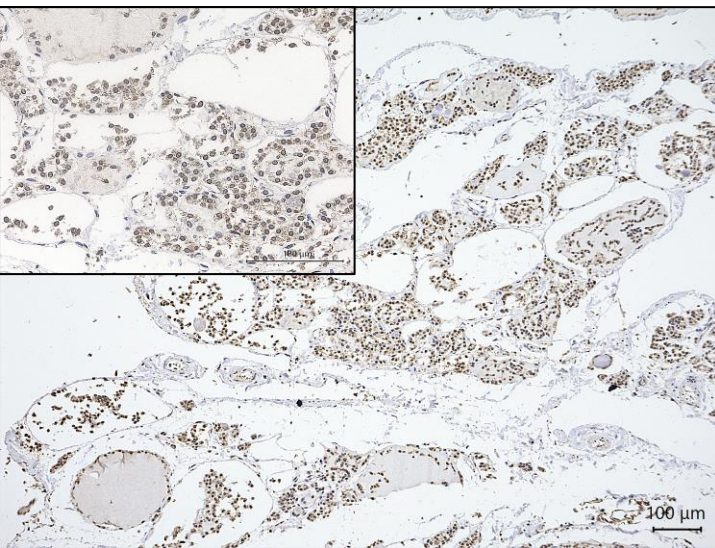

Negative control staining for TR $\alpha$  in thyroid tissue

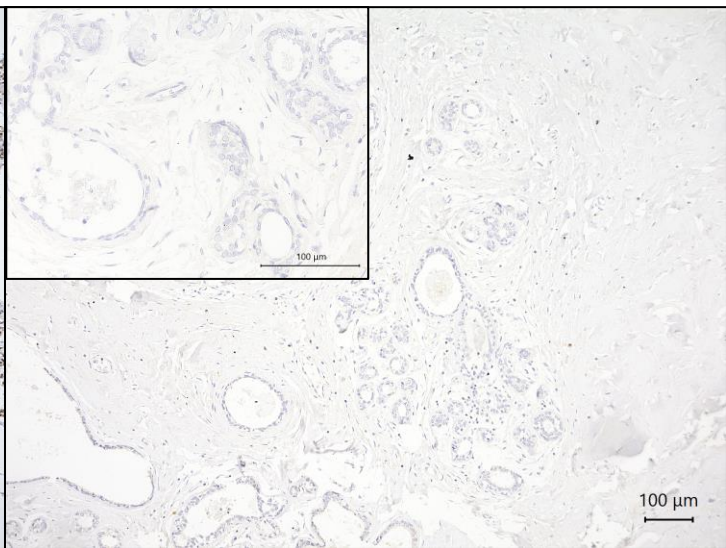

Positive control staining for TR $\alpha$ 2 in human skin

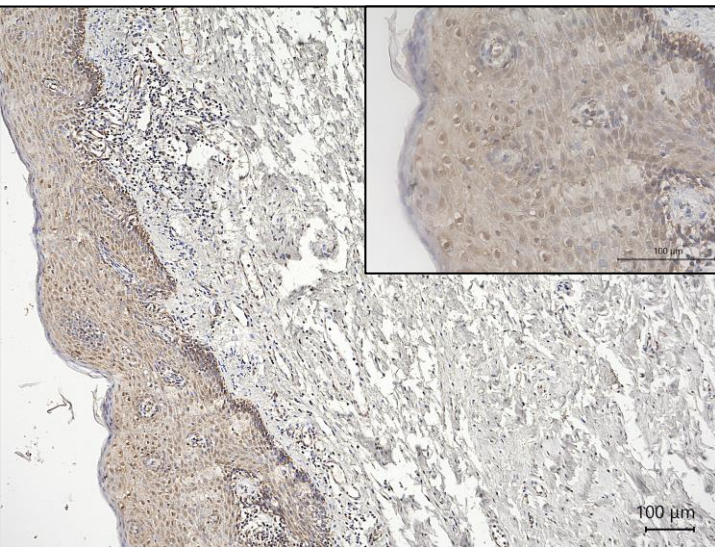

Negative control staining for TR $\alpha$ 2 in human skin

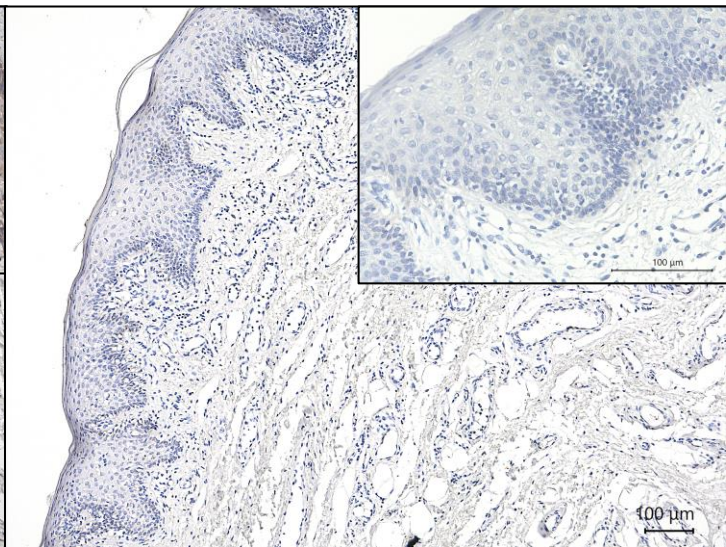

Positive control staining for TR $\alpha$ 1 in human placenta and colon

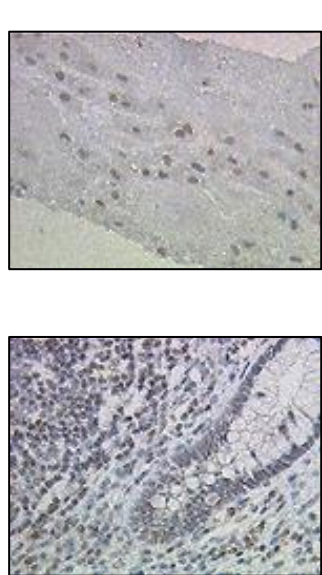

Negative control staining for TR $\alpha$ 1 in human placenta

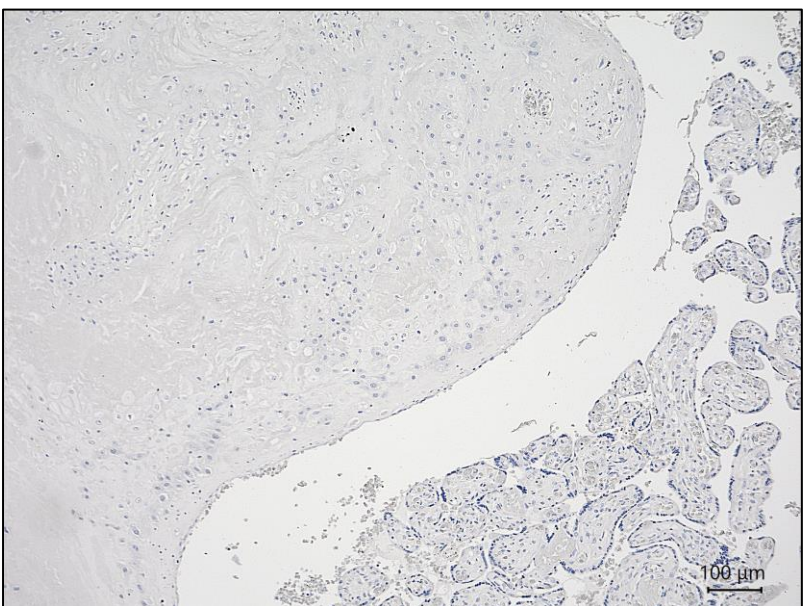

**Suppl. Figure S2:** Survival Function of nuclear TRα, TRα is not a significant prognosticator for overall Survival, ten year survival or disease free survival

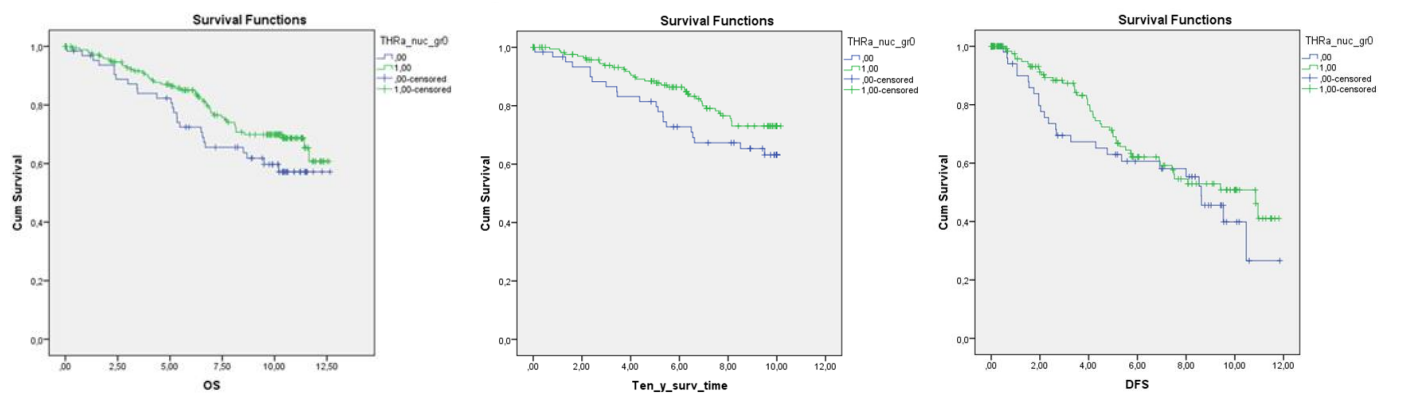

| Means for Survival Time                                                              |            |            |                         |             |
|--------------------------------------------------------------------------------------|------------|------------|-------------------------|-------------|
| THRa_nuc_gr0                                                                         | Mean       |            |                         |             |
|                                                                                      | Estimate   | Std. Error | 95% Confidence Interval |             |
|                                                                                      |            |            | Lower Bound             | Upper Bound |
| 0                                                                                    | 9.39       | 0.537      | 8.337                   | 10.442      |
| 1                                                                                    | 10.246     | 0.299      | 9.66                    | 10.833      |
| Overall                                                                              | 10.026     | 0.265      | 9.506                   | 10.546      |
| a. Estimation is limited to the largest survival time if it is censored.             |            |            |                         |             |
|                                                                                      |            |            |                         |             |
|                                                                                      |            |            |                         |             |
| Overall Comparisons                                                                  |            |            |                         |             |
|                                                                                      | Chi-Square | df         | Sig.                    |             |
| Log Rank (Mantel-Cox)                                                                | 2.34       | 1          | 0.126                   |             |
| Test of equality of survival distributions for the different levels of THRa_nuc_gr0. |            |            |                         |             |

| Means for Survival Time                                                              |            |            |                         |             |
|--------------------------------------------------------------------------------------|------------|------------|-------------------------|-------------|
| THRa_nuc_gr0                                                                         | Mean       |            |                         |             |
|                                                                                      | Estimate   | Std. Error | 95% Confidence Interval |             |
|                                                                                      |            |            | Lower Bound             | Upper Bound |
| 0                                                                                    | 7.93       | 0.405      | 7.136                   | 8.725       |
| 1                                                                                    | 8.82       | 0.205      | 8.417                   | 9.222       |
| Overall                                                                              | 8.605      | 0.189      | 8.236                   | 8.975       |
| a. Estimation is limited to the largest survival time if it is censored.             |            |            |                         |             |
|                                                                                      |            |            |                         |             |
|                                                                                      |            |            |                         |             |
| Overall Comparisons                                                                  |            |            |                         |             |
|                                                                                      | Chi-Square | df         | Sig.                    |             |
| Log Rank (Mantel-Cox)                                                                | 2.582      | 1          | 0.108                   |             |
| Test of equality of survival distributions for the different levels of THRa_nuc_gr0. |            |            |                         |             |

| Means for Survival Time                                                              |            |            |                         |             |
|--------------------------------------------------------------------------------------|------------|------------|-------------------------|-------------|
| THRa_nuc_gr0                                                                         | Mean       |            |                         |             |
|                                                                                      | Estimate   | Std. Error | 95% Confidence Interval |             |
|                                                                                      |            |            | Lower Bound             | Upper Bound |
| 0                                                                                    | 7.213      | 0.637      | 5.965                   | 8.462       |
| 1                                                                                    | 8.129      | 0.406      | 7.333                   | 8.926       |
| Overall                                                                              | 7.872      | 0.345      | 7.197                   | 8.548       |
| a. Estimation is limited to the largest survival time if it is censored.             |            |            |                         |             |
|                                                                                      |            |            |                         |             |
|                                                                                      |            |            |                         |             |
| Overall Comparisons                                                                  |            |            |                         |             |
|                                                                                      | Chi-Square | df         | Sig.                    |             |
| Log Rank (Mantel-Cox)                                                                |            |            |                         |             |
|                                                                                      | 1.395      | 1          | 0.238                   |             |
| Test of equality of survival distributions for the different levels of THRa_nuc_gr0. |            |            |                         |             |



# Suppl. Figure S3: Survival Function of cytoplasmic TRα2, cytoplasmic TRα2 is not a significant prognosticator for overall Survival, ten year survival or disease free survival

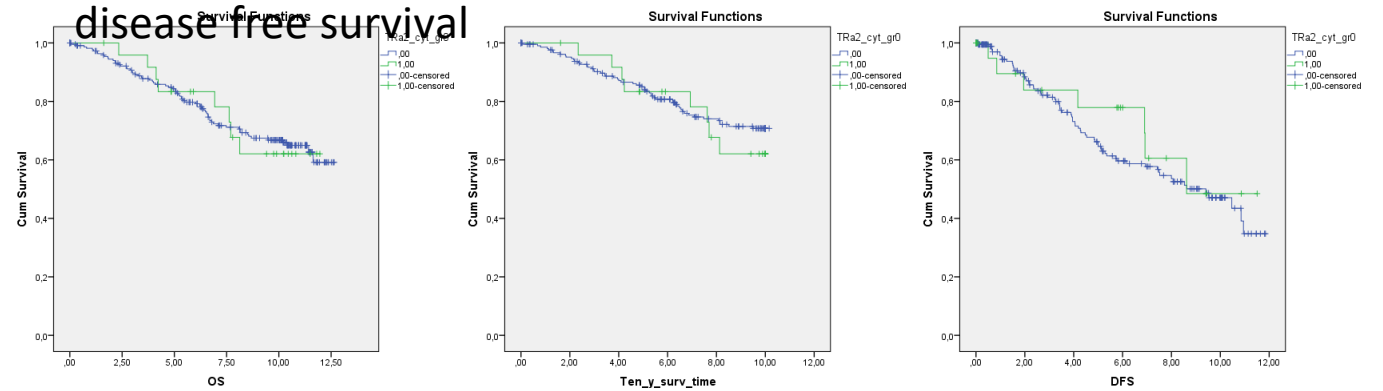

| Means for Survival Time                                                              |            |            |                         |             |
|--------------------------------------------------------------------------------------|------------|------------|-------------------------|-------------|
| TRa2_cyt_gr0                                                                         | Mean       |            |                         |             |
|                                                                                      | Estimate   | Std. Error | 95% Confidence Interval |             |
|                                                                                      |            |            | Lower Bound             | Upper Bound |
|                                                                                      |            |            |                         |             |
| 0                                                                                    | 9.921      | 0.281      | 9.371                   | 10,471      |
| 1                                                                                    | 9.642      | 0.685      | 8.299                   | 10,984      |
| Overall                                                                              | 9.932      | 0.264      | 9,414                   | 10,449      |
| a Estimation is limited to the largest survival time if it is censored.              |            |            |                         |             |
|                                                                                      |            |            |                         |             |
|                                                                                      |            |            |                         |             |
|                                                                                      |            |            |                         |             |
| Overall Comparisons                                                                  |            |            |                         |             |
|                                                                                      | Chi-Square | df         | Sig.                    |             |
| Log Rank (Mantel-Cox)                                                                |            |            |                         |             |
|                                                                                      | 0,002      | 1          | 0,969                   |             |
| Test of equality of survival distributions for the different levels of TRa2_cyt_gr0. |            |            |                         |             |

| Means for Survival Time                                                              |            |            |                |             |  |
|--------------------------------------------------------------------------------------|------------|------------|----------------|-------------|--|
| TRa2_cyt_gr0                                                                         | Mean       |            | 95% Confidence |             |  |
|                                                                                      | Estimate   | Std. Error | Interval       |             |  |
|                                                                                      |            |            | Lower Bound    | Upper Bound |  |
|                                                                                      |            |            |                |             |  |
| 0                                                                                    | 8,53       | 0,203      | 8,131          | 8,928       |  |
| 1                                                                                    | 8,425      | 0,498      | 7,45           | 9,4         |  |
| Overall                                                                              | 8,526      | 0,19       | 8,154          | 8,899       |  |
| a Estimation is limited to the largest survival time if it is censored.              |            |            |                |             |  |
|                                                                                      |            |            |                |             |  |
|                                                                                      |            |            |                |             |  |
|                                                                                      |            |            |                |             |  |
| Overall Comparisons                                                                  |            |            |                |             |  |
|                                                                                      | Chi-Square | df         | Sig.           |             |  |
| Log Rank (Mantel-Cox)                                                                |            |            |                |             |  |
|                                                                                      | 0,278      | 1          | 0,598          |             |  |
| Test of equality of survival distributions for the different levels of TRa2_cyt_gr0. |            |            |                |             |  |

| Means for Survival Time                                                              |            |            |                         |             |
|--------------------------------------------------------------------------------------|------------|------------|-------------------------|-------------|
| TRa2_cyt_gr0                                                                         | Mean       |            |                         |             |
|                                                                                      | Estimate   | Std. Error | 95% Confidence Interval |             |
|                                                                                      |            |            | Lower Bound             | Upper Bound |
| 0                                                                                    | 7,725      | 0,358      | 7,024                   | 8,426       |
| 1                                                                                    | 8,249      | 0,964      | 6,359                   | 10,138      |
| Overall                                                                              | 7,814      | 0,337      | 7,153                   | 8,475       |
| a Estimation is limited to the largest survival time if it is censored.              |            |            |                         |             |
|                                                                                      |            |            |                         |             |
|                                                                                      |            |            |                         |             |
|                                                                                      |            |            |                         |             |
|                                                                                      |            |            |                         |             |
| Overall Comparisons                                                                  |            |            |                         |             |
|                                                                                      | Chi-Square | df         | Sig.                    |             |
| Log Rank (Mantel-Cox)                                                                | 0,428      | 1          | 0,513                   |             |
| Test of equality of survival distributions for the different levels of TRa2_cyt_gr0. |            |            |                         |             |

**Suppl. Figure S4:** Survival Function of cytoplasmic TRα1, cytoplasmic TRα1 is not a significant prognosticator for overall Survival, ten year survival or disease free survival

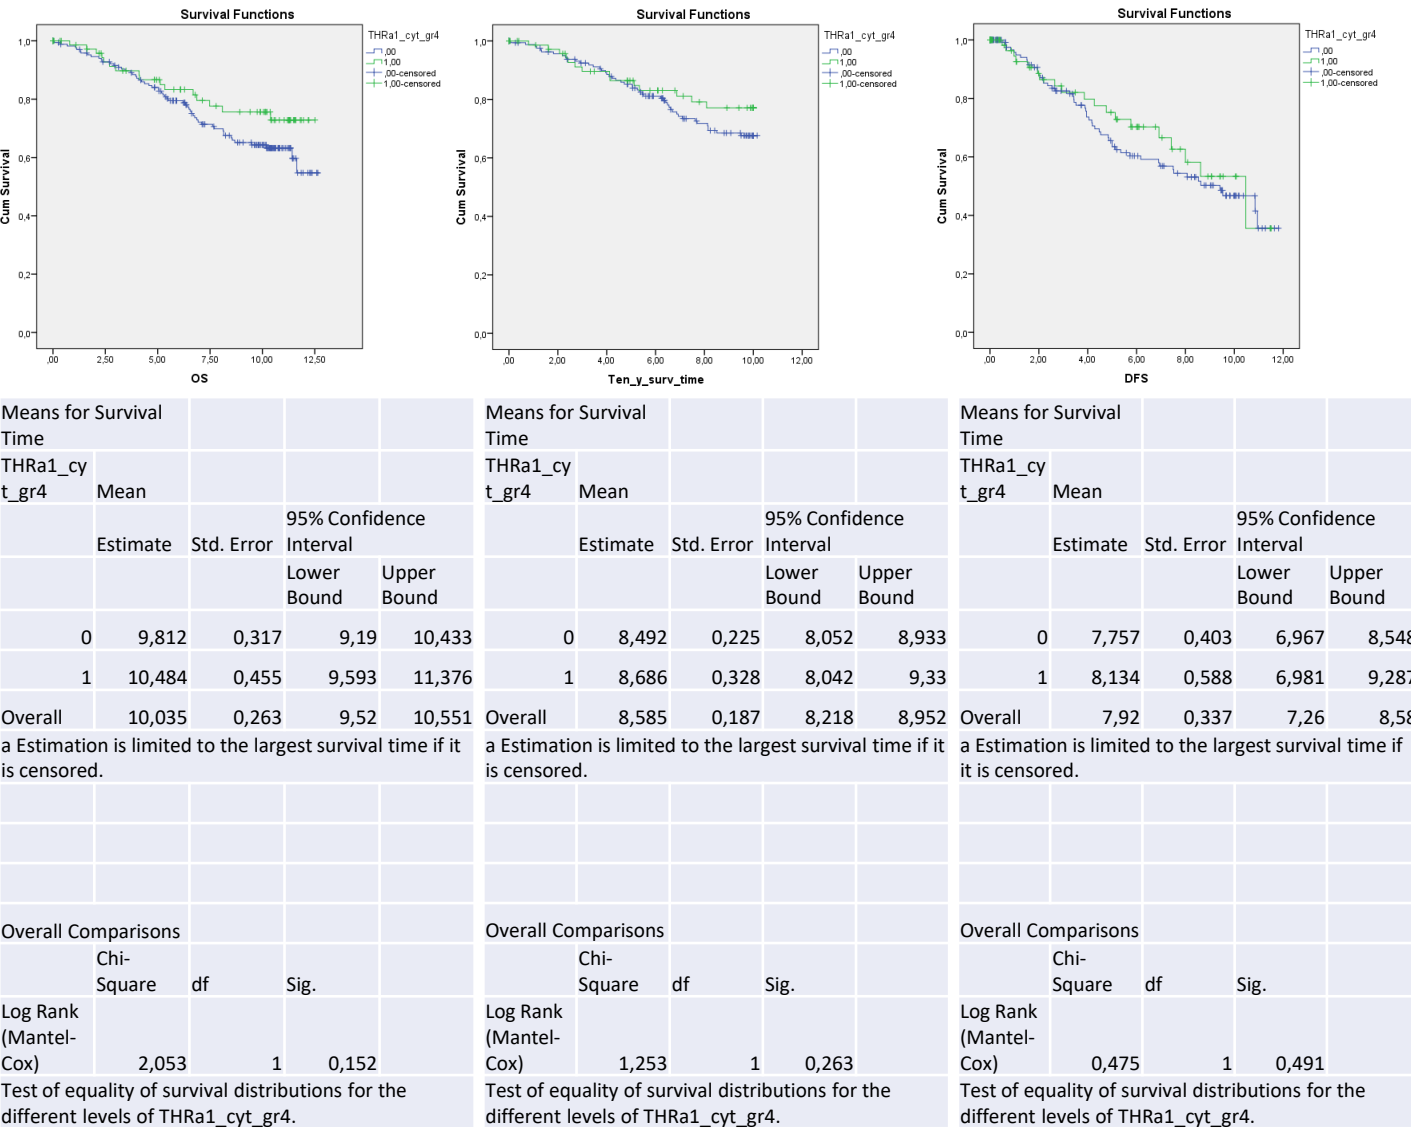

**Suppl. Figure S5:** Survival Function of nuclear TRα1, nuclear TRα1 is not a significant prognosticator for overall Survival, ten year survival or disease free survival

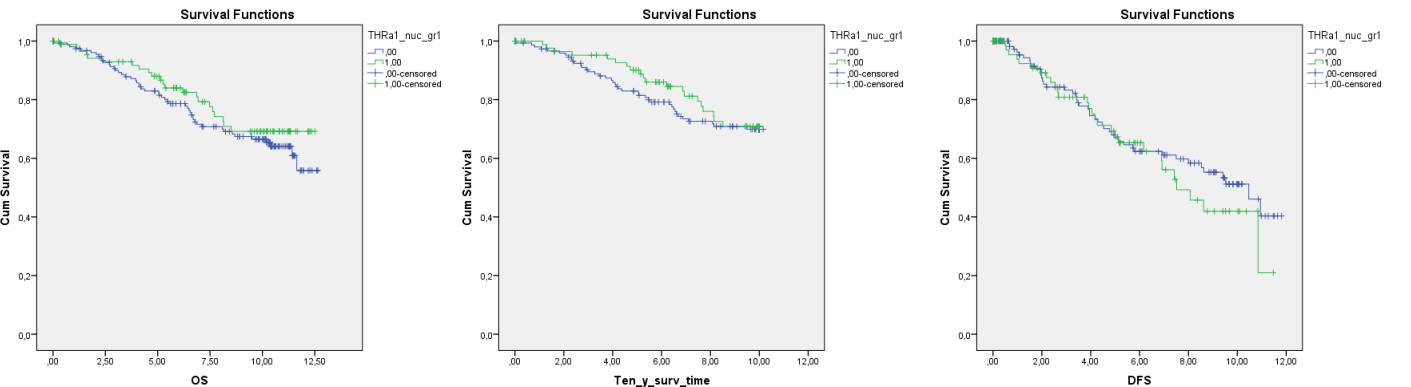

| Means for Survival Time                                                               |            |            |                         |             |
|---------------------------------------------------------------------------------------|------------|------------|-------------------------|-------------|
| THRa1_nuc_gr1                                                                         | Mean       |            |                         |             |
|                                                                                       | Estimate   | Std. Error | 95% Confidence Interval |             |
|                                                                                       |            |            | Lower Bound             | Upper Bound |
| 0                                                                                     | 9,846      | 0,335      | 9,19                    | 10,502      |
| 1                                                                                     | 10,291     | 0,414      | 9,48                    | 11,102      |
| Overall                                                                               | 10,035     | 0,263      | 9,52                    | 10,551      |
| a Estimation is limited to the largest survival time if it is censored.               |            |            |                         |             |
|                                                                                       |            |            |                         |             |
|                                                                                       |            |            |                         |             |
| Overall Comparisons                                                                   |            |            |                         |             |
|                                                                                       | Chi-Square | df         | Sig.                    |             |
| Log Rank (Mantel-Cox)                                                                 |            |            |                         |             |
|                                                                                       | 0,852      | 1          | 0,356                   |             |
| Test of equality of survival distributions for the different levels of THRa1_nuc_gr1. |            |            |                         |             |

| Means for Survival Time                                                               |            |            |                         |             |
|---------------------------------------------------------------------------------------|------------|------------|-------------------------|-------------|
| THRa1_nuc_gr1                                                                         | Mean       |            |                         |             |
|                                                                                       | Estimate   | Std. Error | 95% Confidence Interval |             |
|                                                                                       |            |            | Lower Bound             | Upper Bound |
| 0                                                                                     | 8,429      | 0,248      | 7,942                   | 8,916       |
| 1                                                                                     | 8,736      | 0,266      | 8,214                   | 9,258       |
| Overall                                                                               | 8,585      | 0,187      | 8,218                   | 8,952       |
| a Estimation is limited to the largest survival time if it is censored.               |            |            |                         |             |
|                                                                                       |            |            |                         |             |
|                                                                                       |            |            |                         |             |
|                                                                                       |            |            |                         |             |
| Overall Comparisons                                                                   |            |            |                         |             |
|                                                                                       | Chi-Square | df         | Sig.                    |             |
| Log Rank (Mantel-Cox)                                                                 |            |            |                         |             |
|                                                                                       | 0,321      | 1          | 0,571                   |             |
| Test of equality of survival distributions for the different levels of THRa1_nuc_gr1. |            |            |                         |             |

| Means for Survival Time                                                               |            |            |                         |       |             |
|---------------------------------------------------------------------------------------|------------|------------|-------------------------|-------|-------------|
| THRa1_nuc_gr1                                                                         | Mean       |            |                         |       |             |
|                                                                                       | Estimate   | Std. Error | 95% Confidence Interval |       |             |
|                                                                                       |            |            | Lower Bound             |       | Upper Bound |
|                                                                                       |            |            |                         |       |             |
| 0                                                                                     | 8,062      | 0,425      | 7,229                   | 8,895 |             |
| 1                                                                                     | 7,422      | 0,53       | 6,383                   | 8,46  |             |
| Overall                                                                               | 7,92       | 0,337      | 7,26                    | 8,58  |             |
| a Estimation is limited to the largest survival time if it is censored.               |            |            |                         |       |             |
|                                                                                       |            |            |                         |       |             |
|                                                                                       |            |            |                         |       |             |
|                                                                                       |            |            |                         |       |             |
| Overall Comparisons                                                                   |            |            |                         |       |             |
|                                                                                       | Chi-Square | df         | Sig.                    |       |             |
| Log Rank (Mantel-Cox)                                                                 | 0,594      | 1          | 0,441                   |       |             |
| Test of equality of survival distributions for the different levels of THRa1_nuc_gr1. |            |            |                         |       |             |
